# Supplementary material
Source: publisher site journal article supplement (https://www.dovepress.com/get_supplementary_file.php?f=354120.docx)
Supplement: Supplementary file 1 [file get_supplementary_file.php]

Supplementary Figure 1


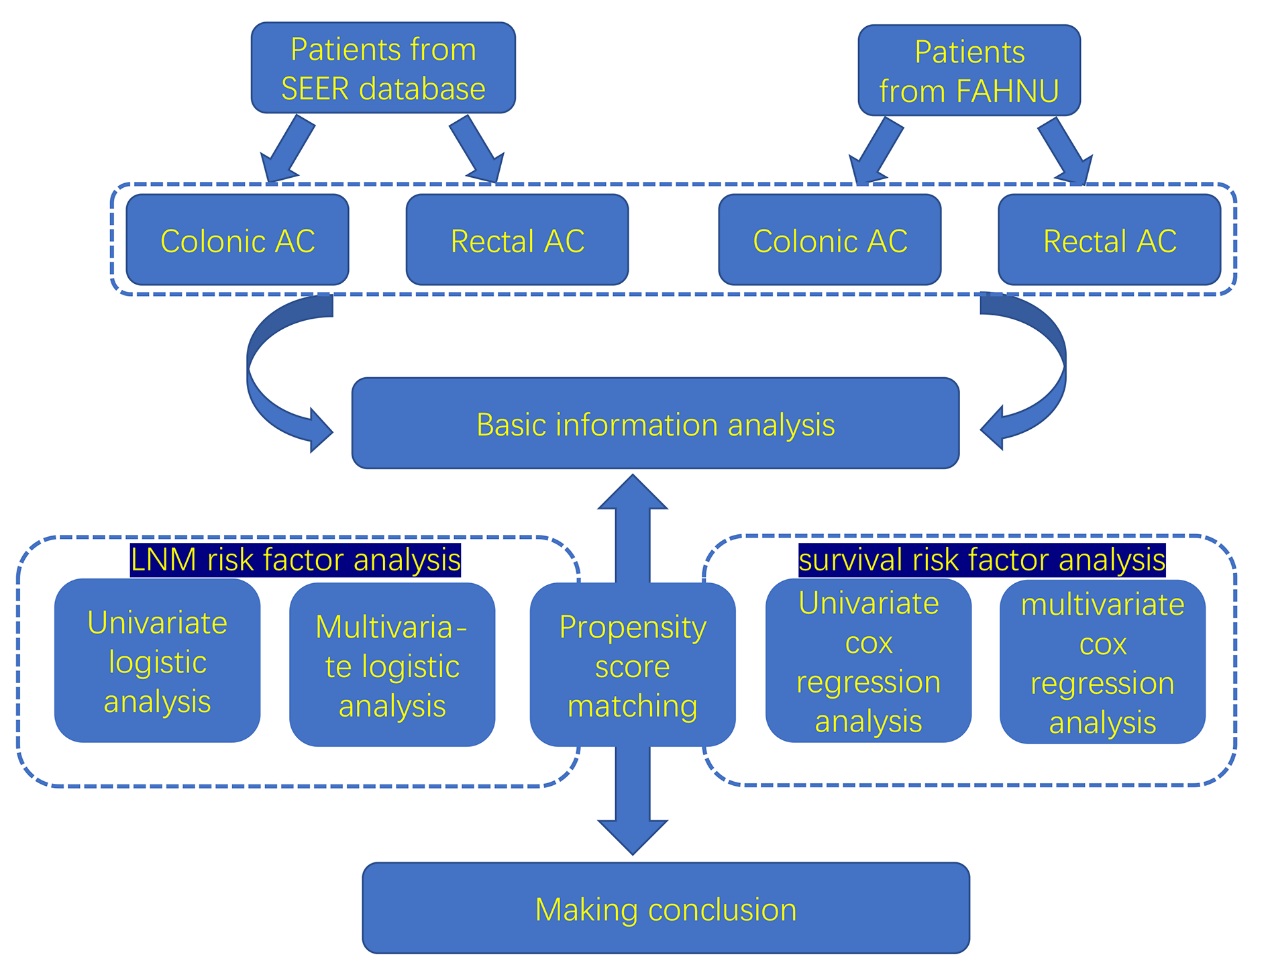


Figure legend: The Flowchart of our study design.

Supplementary table 1: Univariate and multivariate logistic regression model for exploring the potential risk factors for LNM in patients from SEER database

| Variables | Univariate analysis | P Value | Multivariate  analysis | P Value |
| --- | --- | --- | --- | --- |
| Age |  |  |  |  |
| <=50 | Reference | - | Reference | - |
| >50 | 0.497(0.423-0.583) | *<0.001* | 0.561(0.476-0.662) | *<0.001* |
| Gender |  |  |  |  |
| Male | Reference | - |  |  |
| Female | 1.071(0.964-1.189) | 0.201 |  |  |
| Race |  |  |  |  |
| White | Reference | - | Reference | *-* |
| Black | 1.311(1.122-1.532) | *0.001* | 1.353(1.155-1.585) | *<0.001* |
| Another race | 1.414(1.195-1.673) | *<0.001* | 1.417(1.194-1.681) | *0.001* |
| Primary Site |  |  |  |  |
| Colon | Reference | - | Reference | *-* |
| Rectum | 1.635 (1.456-1.836) | *<0.001* | 1.520(1.349-1.714) | *<0.001* |
| Grade |  |  |  |  |
| Well differentiated | Reference | - | Reference | *-* |
| Moderately | 1.770(1.501-2.087) | *<0.001* | 1.672(1.416-1.973) | *<0.001* |
| Poorly differentiated | 3.904(3.135-4.861) | *<0.001* | 3.778(3.028-4.714) | *<0.001* |
| Undifferentiated | 3.643(2.408-5.511) | *<0.001* | 3.553(2.337-5.402) | *<0.001* |
| Tumor size |  |  |  |  |
| <=3cm | Reference | - | Reference | *-* |
| >3cm | 1.459(1.276-1.667) | *<0.001* | 1.396(1.218-1.600) | *<0.001* |
| Examined LNs |  |  |  |  |
| <12 | Reference | - | Reference | *-* |
| >=12 | 1.199(1.068-1.347) | *0.002* | 1.179(1.048-1.327) | *0.006* |

Italic values indicate statistical significance when*P<0.05*

Supplementary table 2: Univariate and multivariate logistic regression model for exploring the potential risk factors for lymph node metastasis in patients from our hospital

| Variables | Univariate analysis | P Value | Multivariate  analysis | P  Value |
| --- | --- | --- | --- | --- |
| Gender |  |  |  |  |
| Male | Reference | - |  |  |
| Female | 1.343 (0.753-2.397) | 0.318 |  |  |
| Age |  |  |  |  |
| <=50 | Reference | - | Reference | - |
| >50 | 0.694 (0.369-2.170) | *0.034* | 0.724 (0.437-2.57) | *0.041* |
| T stage |  |  |  |  |
| T1a | Reference | - |  |  |
| T1b | 1.991 (0.971-4.082) | 0.060 |  |  |
| Tumor type |  | *0.012* |  | 0.273 |
| Invasive type | Reference | - | Reference | - |
| Ulcerative type | 0.441 (0.192-1.013) | 0.054 | 0.684(0.234-1.999) | 0.488 |
| Uplift type | 0.223(0.067-0.737) | *0.014* | 0.299(0.064-1.386) | 0.123 |
| Site |  |  |  |  |
| Colon | Reference | - | Reference | - |
| Rectum | 1.770(0.929-2.376) | *0.028* | 1.560(0.781-2.569) | *0.043* |
| Pathological grade |  |  |  |  |
| Well differentiated | Reference | - | Reference | - |
| Moderately | 15.425(2.101-113.237) | *0.007* | 11.469(1.146-114.813) | *0.038* |
| Poorly differentiated | 14.342(1.624-126.691) | *0.017* | 10.332(0.853-125.21) | 0.067 |
| Lymphatic invasion |  |  |  |  |
| No | Reference | - | Reference | - |
| Yes | 13.156(5.760-30.049) | *<0.001* | 11.964(4.493-31.857) | *<0.001* |
| M stage |  |  |  |  |
| No | Reference | - |  |  |
| Yes | 4.704 (0.840-26.342) | 0.078 |  |  |
| Tumor size |  |  |  |  |
| <=3cm | Reference | - |  |  |
| >3cm | 0.858 (0.456-1.615) | 0.635 |  |  |
| Examined LNs |  |  |  |  |
| <12 | Reference | - | Reference | - |
| >=12 | 2.029 (1.128-3.649) | *0.018* | 1.531(0.752-3.119) | *0.024* |
| Chemotherapy |  |  |  |  |
| No | Reference | - | Reference | - |
| Yes | 10.171 (4.843-21.361) | *<0.001* | 10.663(3.970-28.644) | *<0.001* |
| No | Reference | - |  |  |
| Yes | 0.564(0.267-1.192) | 0.134 |  |  |
| Drinking |  |  |  |  |
| No | Reference | - |  |  |
| Yes | 0.938(0.453-1.939) | 0.862 |  |  |
| Family history |  |  |  |  |
| No | Reference | - |  |  |
| Yes | 1.857(0.396-8.719) | 0.433 |  |  |

Italic values indicate statistical significance when*P<0.05*

Supplementary table 3: Basic information of patients with colorectal adenocarcinoma in T1 stage from 2010 through 2015 in SEER database after PSM for analysis of LNM

|  | Total | Colonic adenocarcinoma | Rectum adenocarcinoma | P value |
| --- | --- | --- | --- | --- |
| Total | 5426 | 2713 | 2713 |  |
| Gender |  |  |  | 1 |
| Male | 3039 (56.01%) | 1522 (56.10%) | 1517 (55.92%) |  |
| Female | 2387 (43.99%) | 1191 (43.90%) | 1196 (44.08%) |  |
| Race |  |  |  | 0.988 |
| White | 4379 (80.70%) | 2190 (80.72%) | 2189 (80.69%) |  |
| Black | 464 (8.55%) | 233 (8.59%) | 231 (8.51%) |  |
| Another race | 583 (10.74%) | 290 (10.69%) | 293 (10.80%) |  |
| Age |  |  |  | 1 |
| <=50 | 694 (12.79%) | 347 (12.79%) | 347 (12.79%) |  |
| >50 | 4732 (87.21%) | 2366(87.21%) | 2366 (87.21%) |  |
| Grade |  |  |  | 0.975 |
| Well differentiated | 702 (12.94%) | 352 (12.97%) | 350 (12.90%) |  |
| Moderately | 4311 (79.45%) | 2157 (79.51%) | 2154 (79.40%) |  |
| Poorly differentiated | 357 (6.58%) | 175 (6.45%) | 182 (6.71%) |  |
| Undifferentiated | 56 (1.03%) | 29 (1.07%) | 27 (1.00%) |  |
| N stage |  |  |  | *<0.001* |
| No | 4604 (84.85%) | 2366 (87.21%) | 2238 (82.49%) |  |
| Yes | 822 (15.15%) | 347 (12.79%) | 475 (17.51%) |  |
| M stage |  |  |  | 0.81 |
| No | 5356 (98.71%) | 2679 (98.75%) | 2677 (98.67%) |  |
| Yes | 70 (1.29%) | 34 (1.25%) | 36 (1.33%) |  |
| Tumor size |  |  |  | 1 |
| <=3cm | 4386 (80.83%) | 2193 (80.83%) | 2193 (80.83%) |  |
| >3cm | 1040 (19.17%) | 520 (19.17%) | 520 (19.17%) |  |
| Examined LNs |  |  |  | 0.955 |
| <12 | 1914 (35.27%) | 958 (35.31%) | 956 (35.24%) |  |
| >=12 | 3512 (64.73%) | 1755 (64.69%) | 1757 (64.76%) |  |
| Liver metastasis |  |  |  | 1 |
| No | 5372 (99.00%) | 2686 (99.00%) | 2686 (99.00%) |  |
| Yes | 54 (1.00%) | 27 (1.00%) | 27 (1.00%) |  |
| Lung metastasis |  |  |  | 0.65 |
| No | 5421 (99.91%) | 2710 (99.89%) | 2711 (99.93%) |  |
| Yes | 5 (0.09%) | 3 (0.11%) | 2 (0.07%) |  |

Italic values indicate statistical significance when *P<0.05*

Supplementary table 4: Basic information of patients with colorectal adenocarcinoma in T1 stage from 2010 through 2015 in SEER database after PSM for analysis of survival

|  | Total | Colonic adenocarcino-ma | Rectum adenocarcino-ma | P value | |
| --- | --- | --- | --- | --- | --- |
| Total | 5406 | 2703 | 2703 |  | |
| Gender |  |  |  | 0.848 | |
| Male | 3035 (56.14%) | 1521 (56.27%) | 1514 (55.92%) |  | |
| Female | 2371 (43.86%) | 1182 (43.73%) | 1189 (44.08%) | |  |
| Race |  |  |  | 0.868 | |
| White | 4373 (80.89%) | 2188 (80.95%) | 2185 (80.84%) |  | |
| Black | 463 (8.57%) | 235 (8.69%) | 228 (8.43%) |  | |
| Another race | 570 (10.54%) | 280 (10.36%) | 290 (10.73%) |  | |
| Age |  |  |  | 0.838 | |
| <=50 | 683 (12.63%) | 344 (12.73%) | 339 (12.54%) |  | |
| >50 | 4723 (87.37%) | 2359 (87.27%) | 2364 (87.46%) |  | |
| Grade |  |  |  | 0.946 | |
| Well differentiated | 704 (13.02%) | 355 (13.14%) | 349 (12.91%) |  | |
| Moderately | 4294 (79.43%) | 2143 (79.28%) | 2151 (79.58%) |  | |
| Poorly differentiated | 354 (6.55%) | 176 (6.51%) | 178 (6.59%) |  | |
| Undifferentiated | 54 (0.10%) | 29 (1.07%) | 25 (0.92%) |  | |
| N stage |  |  |  | 0.885 | |
| No | 4476 (82.80%) | 2240 (82.87%) | 2236 (82.72%) |  | |
| Yes | 930 (17.2%) | 463 (17.13%) | 467 (17.28%) |  | |
| M stage |  |  |  | 0.307 | |
| No | 5344 (98.85%) | 2676 (99.00%) | 2668 (98.71%) |  | |
| Yes | 62 (1.15%) | 27 (1.00%) | 35 (1.29%) |  | |
| Tumor size |  |  |  | 0.917 | |
| <=3cm | 4385 (81.11%) | 2194 (81.17%) | 2191 (81.06%) |  | |
| >3cm | 1021 (18.89%) | 509 (18.83%) | 512 (18.94%) |  | |
| Examined LNs |  |  |  | 0.864 | |
| <12 | 1904 (35.22%) | 949(35.11%) | 955 (35.33%) |  | |
| >=12 | 3502 (64.78%) | 1754 (64.89%) | 1748 (64.67%) |  | |
| Liver metastasis |  |  |  | 0.772 | |
| No | 5358 (99.11%) | 2680 (99.15%) | 2678 (99.08%) |  | |
| Yes | 48 (0.89) | 23 (0.85%) | 25 (0.92%) |  | |
| Lung metastasis |  |  |  | 0.414 | |
| No | 5400 (99.89%) | 2701 (99.93%) | 2699 (99.85%) |  | |
| Yes | 6 (0.11%) | 2 (0.07%) | 4 (0.15%) |  | |
